# Supplementary material for: Plasmonic nanoprobes on single AuNTs for evaluating and monitoring the dynamic release of 2D drug carriers
Source: Royal Society of Chemistry journal article supplement (doi:10.1039/d3tb02255b), 2023-01-01
Supplement: d3tb02255b1.pdf [file d3tb02255b1.pdf]

## Electronic Supplementary information

### Plasmonic nanoprobe on single AuNTs for evaluating and monitoring dynamic release of 2D drug carrier

Zejie Yu,<sup>†a</sup> Yi Wang,<sup>†a</sup> Miaomiao Cai,<sup>a</sup> Jiachang Chen,<sup>a</sup> Qirong Zou,<sup>a</sup> Quli Fan,<sup>a</sup> and Zhang Lei<sup>\*a</sup>

<sup>a</sup> State Key Laboratory of Organic Electronics and Information Displays & Institute of Advanced Materials (IAM), Nanjing University of Posts & Telecommunications, Nanjing 210023, China. E-mail: [iamlzhang@njupt.edu.cn](mailto:iamlzhang@njupt.edu.cn)

<sup>†</sup> These authors contributed equally.

### S1 Supporting Figures

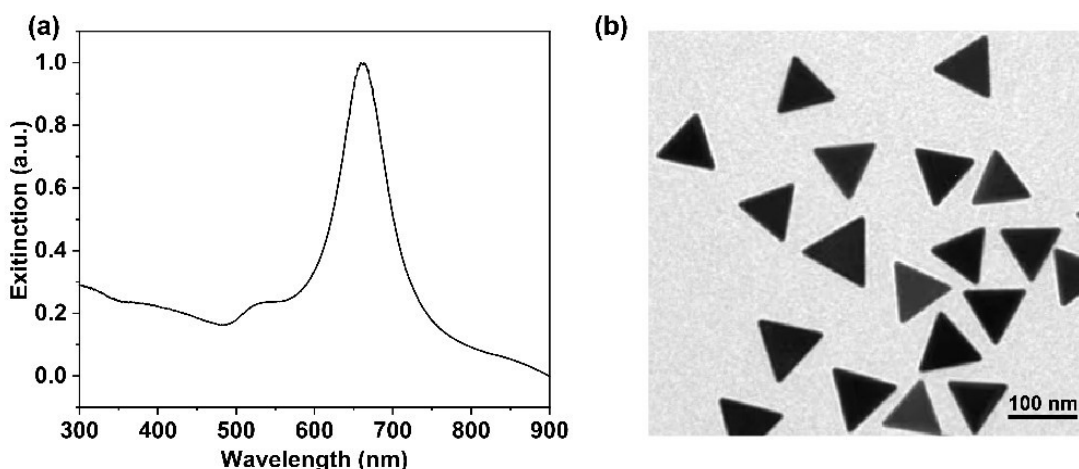

**Fig S1** (a) UV-Vis absorption spectra of AuNTs. (b) TEM image of the AuNTs.

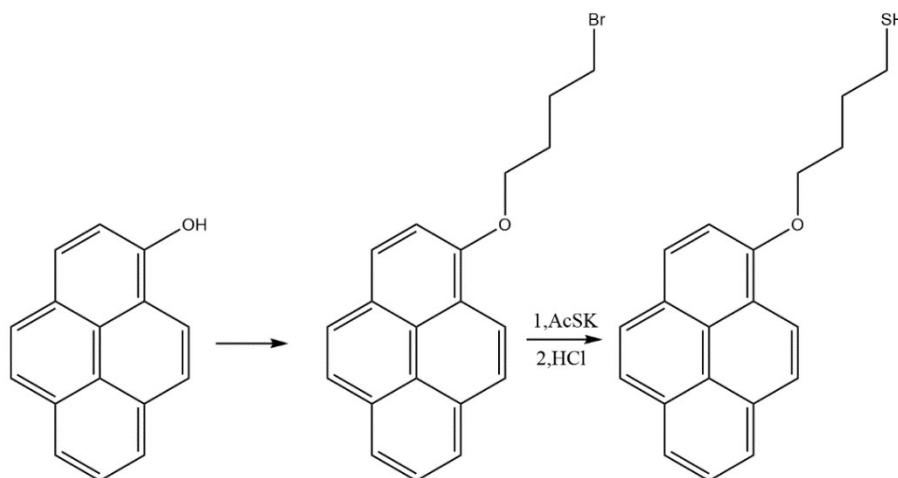

**Fig S2** Schematic diagram of the synthesis of TMP.

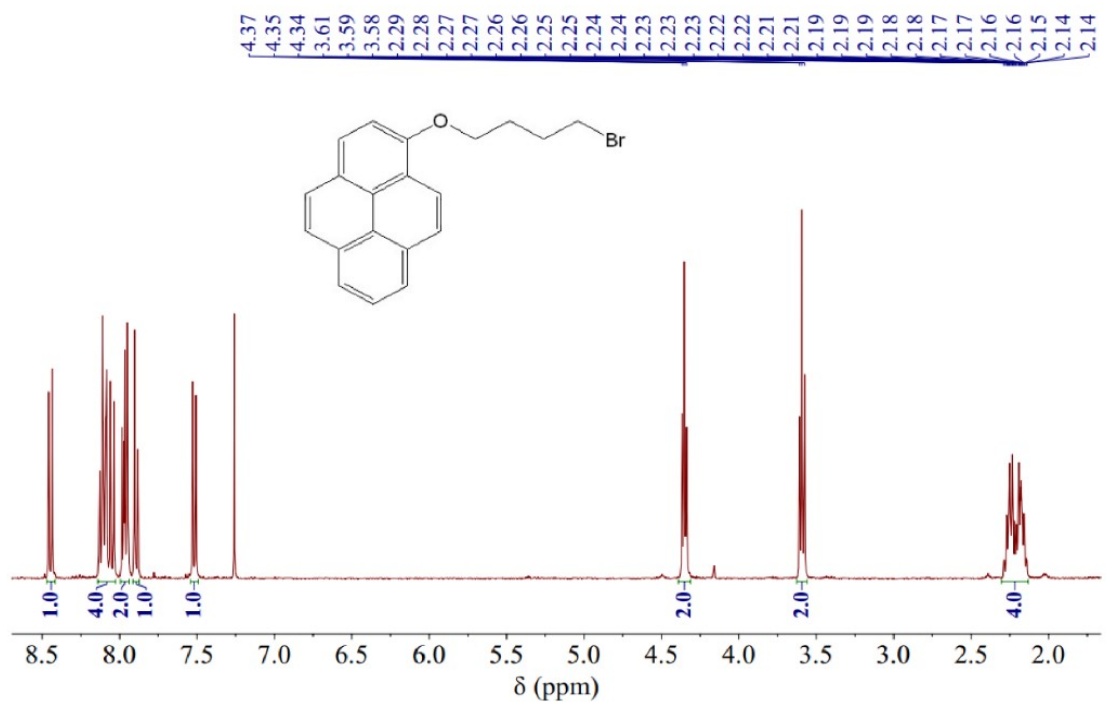

**Fig S3** TBH's proton nuclear magnetic resonance spectra.

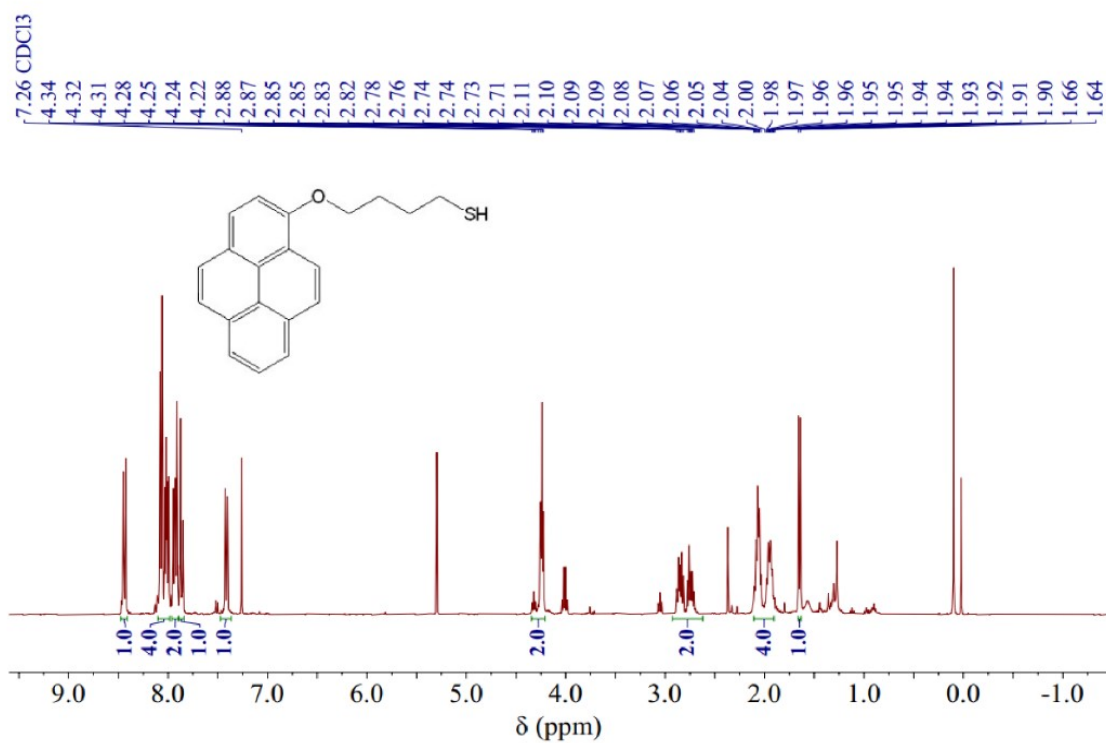

**Fig S4** TMP's proton nuclear magnetic resonance spectra.

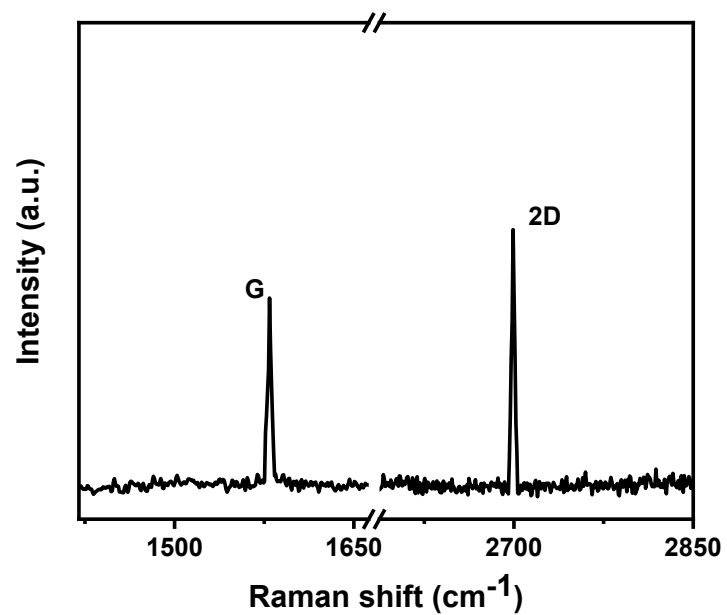

**Fig S5** Characteristic Raman spectra of monolayer graphene.

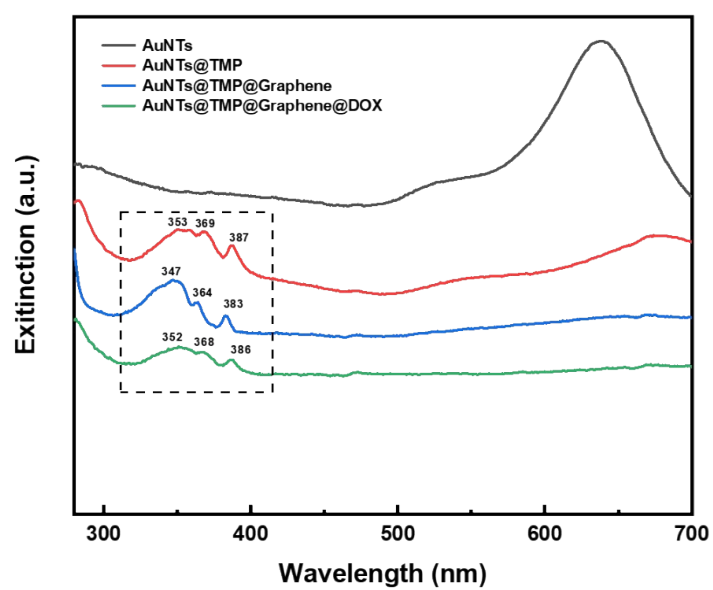

**Fig S6** UV-Vis spectra of AuNTs sequentially connected to TMP, graphene and loaded DOX.

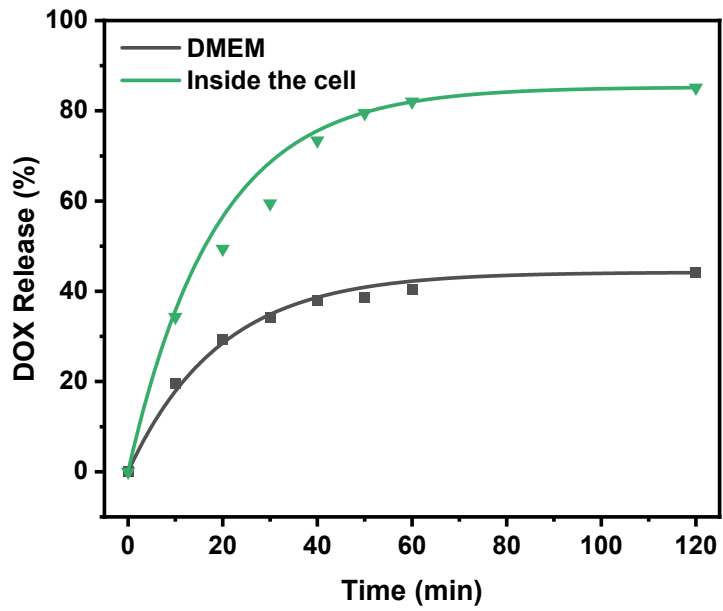

**Fig S7** Fitting of Langmuir adsorption isotherm equation for DOX release rate of drug download system under DMEM.

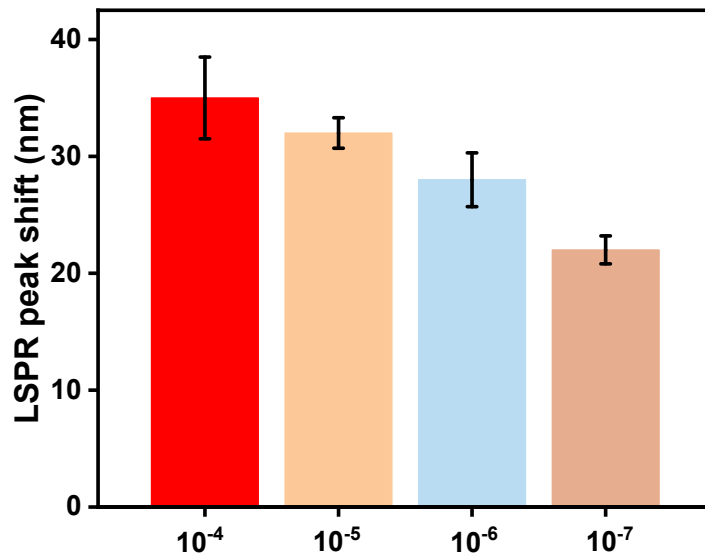

**Fig S8** LSPR peak displacement due to TMP at different concentrations (n=5).

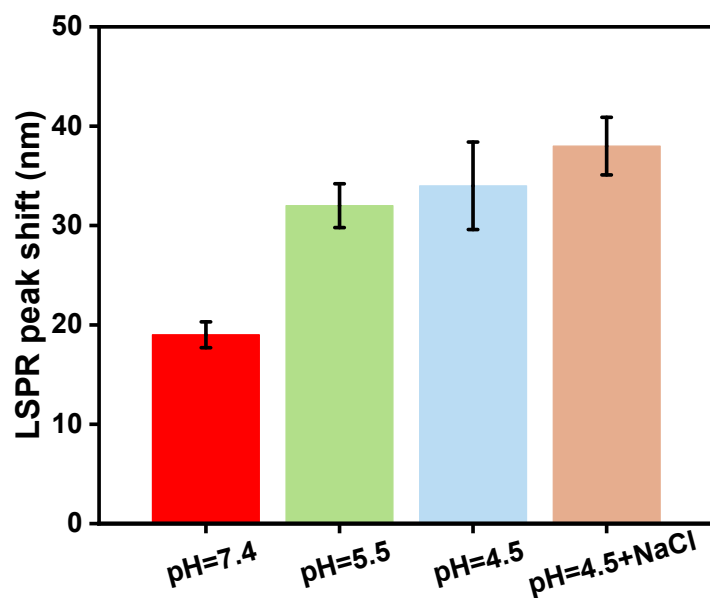

**Fig S9** Repeatability test of DOX release under different external environments (n=5).

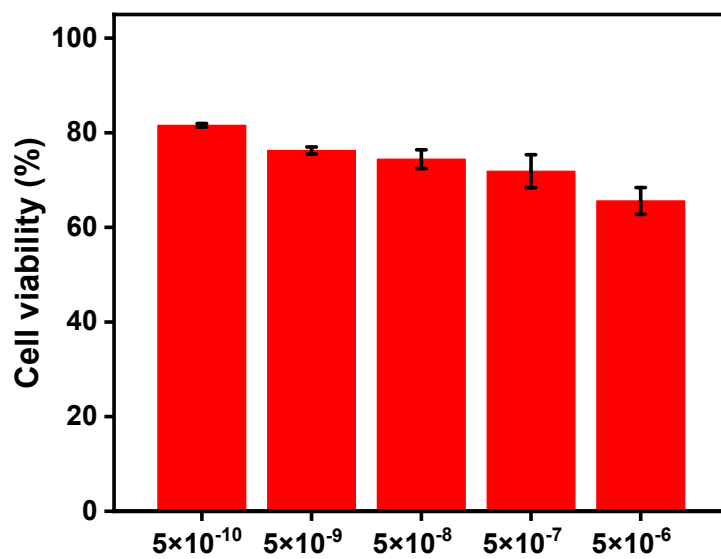

**Fig S10** Cytotoxicity assessment at different concentrations after 24h (n=5).

**Table S1** Statistical regression coefficients ( $R^2$ ) applied to different DOX release kinetic models

| Model            | Equation                      | $R^2$ Value | k      | b      |
|------------------|-------------------------------|-------------|--------|--------|
| Zero-order       | $Q = kx + b$                  | 0.8622      | 1.123  | 13.78  |
| First-order      | $\ln(100-Q) = -kt + b$        | 0.9612      | -0.02  | 4.4956 |
| Hixson-Crowell   | $(W_0 - W_t)^{1/3} = -kt + b$ | 0.9322      | -0.026 | 4.467  |
| Korsmeyer-Peppas | $Q_t/Q_{max} = kt^n$          | 0.9279      | 2.1025 | 0.14   |
| Higuchi          | $Q = kt^{1/2}$                | 0.9978      | 9.6967 | Null   |

Note: 't' represents the time required for a specific fraction of drug 'Q' to be released from the formulation; 'k' denotes the rate constant, and 'b' represents a constant value.

**Video S1** The LSPR scattering intensity of AuNTs@Graphene nanoparticles in DFM video

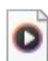

AuNTs@Graphen  
e 0.33fps.avi
